# Supplementary material
Source: PubMed Central journal article supplement (PMC2984184)
Supplement: 1008247107_pnas.201008247SI.pdf [file 1008247107_pnas.201008247SI.pdf]

# Supporting Information

Valmori et al. 10.1073/pnas.1008247107

## SI Materials and Methods

**Samples, Cell Purification, and ex Vivo Cell Sorting.** Peripheral blood mononuclear cells (PBMCs) were isolated from peripheral blood samples by density gradient sedimentation using LSM 1077 lymphocyte separation medium (PAA Laboratories). CD4<sup>+</sup> T cells were enriched by positive selection by magnetic cell sorting (Miltenyi Biotec). For ex vivo flow cytometry cell sorting, enriched CD4<sup>+</sup> T cells were stained with mAb specific for CD4, CD8, CD45RA (BD Biosciences), CD25 (Beckman Coulter), and CD127 (eBioscience), and CD4<sup>+</sup>CD8<sup>-</sup>CD45RA<sup>+</sup> lymphocytes were separated into naive CD25<sup>-</sup>CD127<sup>high</sup> conventional CD4<sup>+</sup> T cells (N) and naive CD25<sup>+</sup>CD127<sup>low</sup> Treg (NTreg) to high purity (>97%) using a FACSAria (BD Biosciences). Aliquots of sorted populations were stained with anti-FOXP3 mAb (eBioscience) and analyzed by flow cytometry.

**Phenotypic Assessment and Flow Cytometry Cell Sorting of Differentiated Cultures.** On day 5 or 12 following in vitro stimulation, aliquots of differentiated N and NTreg cultures were stained with fluorochrome-labeled anti-IL-1RI mAb (R&D Systems) and/or anti-CCR6 mAb (BD Biosciences), or unlabeled anti-IL-23R antibodies followed by fluorochrome-labeled goat anti-rabbit Ig antibodies (R&D Systems) and analyzed by flow cytometry. For some experiments, day 12 cultures were stained with anti-CCR6 mAb and sorted into CCR6<sup>+</sup> and CCR6<sup>-</sup> populations or with anti-IL-1RI and anti-CCR6 mAb and sorted into IL-1RI<sup>+</sup>CCR6<sup>-</sup>, IL-1RI<sup>+</sup>CCR6<sup>+</sup>, and IL-1RI<sup>-</sup>CCR6<sup>+</sup> populations by flow cytometry.

## Assessment of Cytokine Production and ROR $\gamma$ t and FOXP3 Expression.

In vitro differentiated CD4<sup>+</sup> T cells were stimulated with PMA (100 ng/mL, Sigma Aldrich) and ionomycin (1  $\mu$ g/mL, Sigma Aldrich) for 5 h. Brefeldin A (10  $\mu$ g/mL, Sigma Aldrich) was added 1 h after the beginning of the incubation. Cells were then fixed, permeabilized, and stained with mAb specific for IL-17A (eBioscience), IL-17F (eBioscience), IL-2 (BD Biosciences), IL-4 (BD Biosciences), IL-10 (BD Biosciences), IL-21 (BD Biosciences), IL-22 (R&D systems), IFN- $\gamma$  (BD Biosciences), and TNF- $\alpha$  (BD Biosciences), as indicated, and analyzed by flow cytometry. Expression of ROR $\gamma$ t and FOXP3 with respect to IL-17 production was also assessed following PMA and ionomycin stimulation, specific mAb staining (eBioscience), and flow cytometry analysis.

**Assessment of Suppressor Function.** The ability of in vitro differentiated or ex vivo sorted CD4<sup>+</sup> T-cell populations to suppress the growth of responder CD4<sup>+</sup>CD25<sup>-</sup> T cells was assessed by coculture of CFSE- (Invitrogen) labeled responder conventional CD4<sup>+</sup> T cells ( $3 \times 10^4$ ) with or without test populations, in 96-well U-bottom plates, in the presence of  $3 \times 10^4$  irradiated monocytes and PHA (HA16, 0.5  $\mu$ g/mL, OXOID). Growth of responder cells was assessed by flow cytometry analysis of CFSE dilution in day 4–6 cultures. The growth (100 – % undivided cells) of the wells with suppressor cells (experimental group) was compared with that of the wells without suppressors (control). The percentage of suppression was determined as follows:  $100 - [(growth\ of\ experimental\ group / growth\ of\ control) \times 100]$ .
